# Supplementary material for: Bordetella pertussis: an underreported pathogen in pediatric respiratory infections, a prospective cohort study
Source: PubMed Central journal article supplement (PMC4261543; doi:10.1186/1471-2334-14-526), 2014-09-30

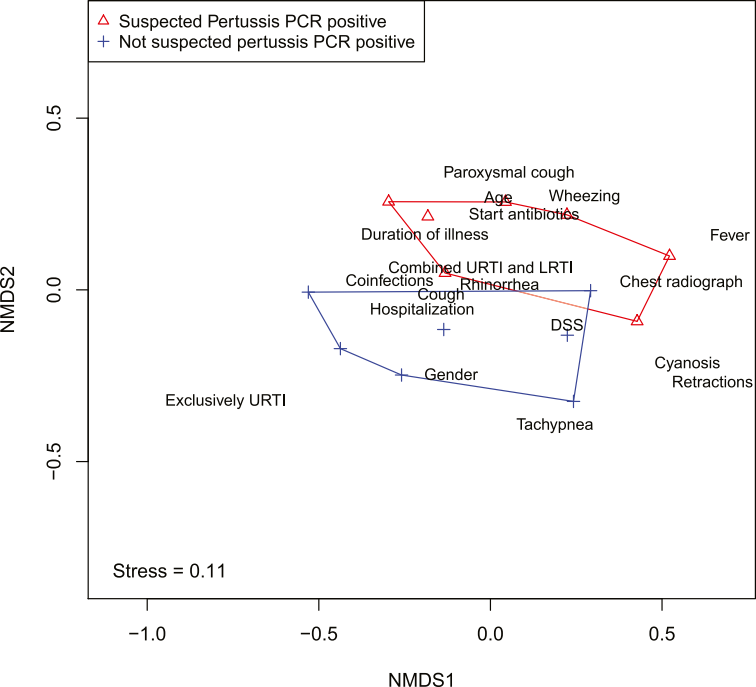

Supplement: 12879_2014_3847_MOESM2_ESM.pdf [file 12879_2014_3847_MOESM2_ESM.pdf]
